# Supplementary material
Source: Springer Nature journal article supplement (https://www.springermedizin.de/resource/supplementary/13075_2010_9696_MOESM3_ESM.pdf/9693314)
Supplement: MOESM3 [file 9693314]

**A** PATELLA SUBCH CORT THICKNESS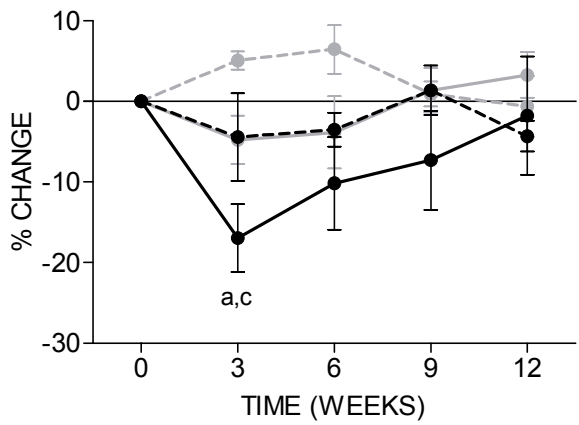

--- Sham+Sal      --- OVX+Sal  
 — Sham+IA      — OVX+IA

**B** PATELLA SUBCH CORT THICKNESS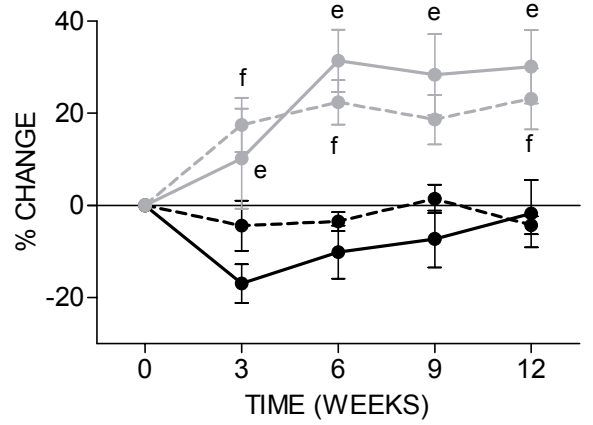

--- OVX+Sal      --- OVX+E+Sal  
 — OVX+IA      — OVX+E+IA

**C** MEDIAL SUBCH PLATE THICKNESS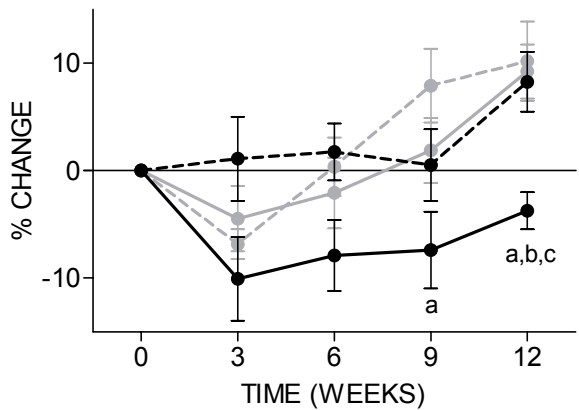

--- Sham+Sal      --- OVX+Sal  
 — Sham+IA      — OVX+IA

**D** MEDIAL SUBCH PLATE THICKNESS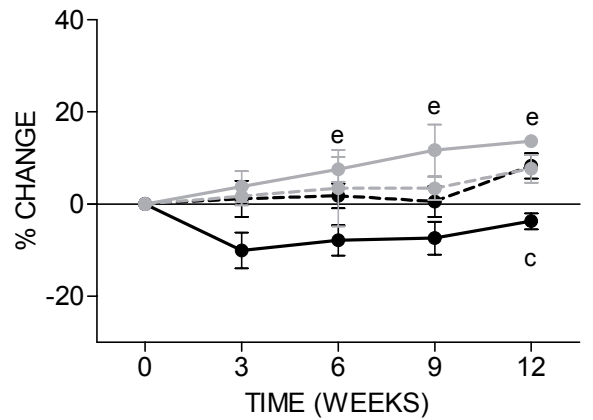

--- OVX+Sal      --- OVX+E+Sal  
 — OVX+IA      — OVX+E+IA

**E** LATERAL SUBCH PLATE THICKNESS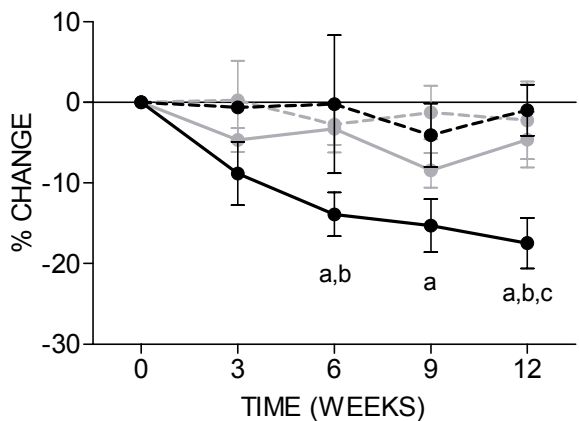

--- Sham+Sal      --- OVX+Sal  
 — Sham+IA      — OVX+IA

**F** LATERAL SUBCH PLATE THICKNESS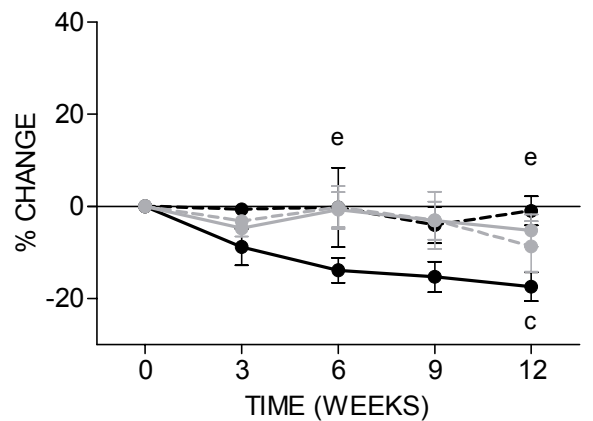

--- OVX+Sal      --- OVX+E+Sal  
 — OVX+IA      — OVX+E+IA
